# Supplementary material for: CMIP6/PMIP4 simulations of the mid-Holocene and Last Interglacial using HadGEM3: comparison to the pre-industrial era, previous model versions and proxy data
Source: Copernicus journal article supplement (doi:10.5194/cp-16-1429-2020), 2020-08-06
Supplement: Supplementary file 1 [file Hoffman_etal_2017_127konly_final.xlsx]

## Sheet: ALL
LIG SST data used in Williams et al. (2020). "CMIP6/PMIP4 simulations of the mid-Holocene and Last Interglacial using HadGEM3: comparison to the pre-industrial era, previous model versions, and proxy data". Climate of the Past.
Dataset extracted from pdf Tables S1 & S2 and excel SOM file from Hoffman et al. Science 2017
North Atlantic	Latitude	Longitude	SST reconstruction method	Inferred proxy signal	[127ka -2SD] Abs. Temp. (°C)	[127ka Mean] Abs. Temp. (°C)	[127ka +2SD] Abs. Temp. (°C)	[1870-1889] HadISST Temp. (°C)	[127ka Mean] Temp. Ano. (°C)
M23323	67.77	5.92	Alkenones	Annual	0.390805	3.98119	11.0026	7.47	-3.48881		Annual* = Hoffman et al. 2017 took a site average between summer and winter SST estimates
M23323	67.77	5.92	Forams	Summer	7.2927	9.7176	12.349	7.47	2.2476		Forams = please look at Table S1 from Hoffman et al. 2017 for details on the method (e.g. transfer function, % pachyderma, ….)
V28-14	64.78	-29.57	Forams	Annual *	3.84617	8.89136	11.9668	6.6	2.29136
EW9302-JPC8	61.42	-25	Forams	Summer	7.9703	12.7828	16.5953	9.38	3.4028
ODP980	55.48	-14.7	Forams	Summer	7.72575	14.4732	17.7857	11.92	2.5532
NA87-25	55.18	-14.73	Forams	Summer	12.1339	15.2851	17.9262	11.92	3.36513
V27-20	54	-46.2	Forams	Annual*	8.03515	10.7166	13.0872	7.15	3.56659
M23414-9	53.53	-20.29	Forams	Annual*	5.78681	12.2337	14.3405	12.07	0.163743
NEAP18k	52.76	-30.35	Forams	Summer	12.0413	15.6975	19.377	10.9	4.79755
V23-82	52.58	-21.93	Forams	Annual*	3.13814	9.7356	13.3989	12.25	-2.5144
K708-1	50	-23.74	Forams	Annual*	8.8146	13.9368	17.0684	13.39	0.546781
MD04-2845	45.35	-5.22	Forams	Summer	3.74419	17.8056	20.3154	15.04	2.76565
V29-179	44	-23.51	Forams	Annual*	10.5936	16.2281	19.565	16.15	0.078146
SU92-03	43.2	-10.11	Forams	Summer	6.31579	17.2326	18.8797	15.5	1.73256
D-117	42.1	-52.75	Forams	Annual*	14.4792	17.1603	19.7324	15.77	1.39026
CH69K09	41.76	-47.35	Forams	Summer	12.2813	16.2699	20.9239	16.7	-0.430109
V30-97	41	-32.93	Forams	Annual*	14.3701	17.4491	20.0483	18.34	-0.890865
MD95-2040	40.58	-9.87	Alkenones	Annual	11.1342	16.2917	20.991	16.29	0.00172654
MD95-2040	40.58	-9.87	Forams	Summer	7.02461	14.0555	20.4026	16.29	-2.23447
SU90-03	40.5	-32.05	Forams	Summer	15.6549	20.9531	24.8365	18.23	2.7231
MD01-2444	37.57	-10.13	Alkenones	Annual	14.3765	20.088	22.0945	17.56	2.52796
MD01-2444	37.57	-10.13	Mg/Ca	Annual	19.4882	21.5387	23.5866	17.56	3.97874
MD95-2036	33.68	-57.57	Forams	Summer	20.5592	24.1178	27.8868	22.15	1.96776
KNR140-37JPC	31.68	-75.42	Forams	Summer	21.8223	26.0606	29.8799	24.46	1.60065
MD02-2575	29	-87.11	Mg/Ca	Annual	26.2464	28.2617	30.1495	25.04	3.22167
GIK15637-1	27	-18.98	Forams	Annual*	19.6522	21.446	23.2823	21.43	0.0160372
M12392-1	25.16	-16.85	Forams	Annual*	14.7548	17.3393	19.7855	20.5	-3.16068
TR126-29	21.33	-93.95	Forams	Annual*	23.3579	25.122	26.8439	26.36	-1.23797
TR126-23	20.48	-95.62	Forams	Annual*	23.1431	25.0056	26.7456	26.04	-1.03438
M35027-1	17.64	-67.17	Forams	Annual	23.4673	25.8124	27.9194	27.45	-1.63755
V22-196	13.83	-18.97	Forams	Annual*	19.2375	24.8501	27.5109	24.71	0.140068
V28-127	11.65	-80.13	Forams	Annual*	25.1223	27.4501	29.9339	27.67	-0.21992
MD03-2707	2.5	9.39	Mg/Ca	Annual	24.8203	26.5829	28.5317	27.35	-0.767081
V25-59	1.37	-33.48	Forams	Annual*	23.9162	25.8853	27.9853	26.78	-0.89474
Pacific Ocean
Y7211-1	43.25	-126.38	Radiolaria	Annual*	11.2916	16.6357	20.7679	19.64	-3.00433
ODP1020	41	-126.43	Alkenones	Annual	11.3902	14.1759	15.2472	12.73	1.44588
ODP1018	36.99	-123.27	Alkenones	Annual	10.7439	15.6633	21.4177	13.57	2.09334
MD01-2421	36.02	141.78	Alkenones	Annual	21.2661	22.7836	24.2195	19.28	3.50364
ODP893	34.28	-120.03	Alkenones	Annual	17.0348	18.771	20.4625	15.34	3.43101
ODP1014A	32.8	-118.9	Alkenones	Annual	16.1456	19.0298	20.3634	16.06	2.9698
ODP1012	32.28	-118.38	Alkenones	Annual	17.3858	19.681	21.1116	16.52	3.16101
LAPAZ21	22.98	-109.47	Alkenones	Annual	25.7296	27.3142	28.9301	24.78	2.53424
ODP1145	19.53	117.63	Mg/Ca	Annual	22.9928	24.9422	26.8986	26.46	-1.5178
ODP1146	19.45	116.27	Alkenones	Annual	25.0346	26.9076	28.5199	26.57	0.337572
MD97-2151	8.73	109.87	Alkenones	Annual	26.2277	28.1295	29.9293	27.67	0.459543
GIK17961-2	8.5	112.33	Alkenones	Annual	27.1163	28.608	30.1498	27.89	0.718001
V28-238	1.02	160.48	Forams	Annual*	26.2703	28.5541	30.9779	28.96	-0.405925
W8402A	0.95	-138.95	Alkenones	Annual	25.7674	27.239	28.8591	26.04	1.19897
TR163-22	0.5	-92.4	Mg/Ca	Annual	21.2028	22.9803	24.9964	24.43	-1.44967
ODP846	-3.08	-90.82	Alkenones	Annual	22.1562	23.8825	25.6339	23.27	0.612524
V19-29	-3.57	-83.22	Forams	Annual	18.4169	21.2613	23.9952	22.51	-1.24866
Y71-6-12	-16.45	-77.57	Radiolaria	Annual*	15.8955	20.698	24.9477	19.64	1.05804
MD06-3018	-23	166.13	Mg/Ca	Annual	26.0912	27.7732	29.7288	24.29	3.48321
MD97-2121	-40.38	177.98	Alkenones	Annual	18.6012	20.3984	21.9178	13.38	7.01842
RC15-61	-40.62	-77.2	Radiolaria	Annual*	4.76043	7.91221	10.8151	11.66	-3.74779
ODP1123	-41.79	-171.5	Forams	Annual	12.5029	16.5479	20.7206	11.7	4.84787
MD97-2106	-45.15	146.29	Forams	Annual	9.78693	14.0969	18.3604	10.86	3.23686
DSDP594	-45.5	174.95	Forams	Annual	8.02049	11.3214	14.826	10.86	0.461431
MD97-2120	-45.52	174.93	Mg/Ca	Annual	16.9346	18.5899	21.2299	10.86	7.72988
Y9	-48.24	177.34	Forams	Annual	9.37708	13.5931	17.965	9.61	3.98307
MD97-2108	-48.5	149.11	Forams	Annual	6.82	11.4349	15.4755	9.5	1.93493
MD97-2109	-50.63	169.38	Forams	Annual	2.86691	7.54592	12.4855	8.9	-1.35408
Indian Ocean
V34-88	16.52	59.53	Forams	Annual*	23.3338	25.4697	27.873	26.16	-0.690348
RC12-339	9.13	90.03	Forams	Annual*	24.9715	27.0695	29.0774	28.22	-1.1505
GeoB10038-4	-5.94	103.25	Mg/Ca	Annual	25.9081	27.7231	29.8089	28.25	-0.526945
GeoB10038-4	-5.94	103.25	Alkenones	Annual	26.8632	28.3755	29.914	29.25	-0.874475
MD01-2378	-13.08	121.79	Mg/Ca	Annual	26.7779	28.9751	30.946	28.3	0.675062
V28-345	-17.67	117.95	Forams	Annual*	24.7828	27.0127	29.2056	27.23	-0.217274
MD94-101	-42.5	79.42	Forams	Summer	10.0211	12.5636	15.059	9.76	2.80363
MD84-527	-43.49	51.2	Diatoms	Summer	3.89646	6.64338	8.88396	10.62	-3.97662
MD94-102	-43.5	79.83	Forams	Summer	10.2352	12.8068	15.1699	7.45	5.35683
MD73-25	-43.82	51.3	Radiolaria	Annual*	3.17371	5.07883	6.95796	11.87	-6.79117
MD88-770	-46.01	96.47	Forams	Summer	6.73478	8.67653	10.4511	8.2	0.476528
MD88-770	-46.01	96.47	Diatoms	Annual	7.98535	10.1347	12.2404	8.2	1.93468
MD02-2488	-46.45	88.02	Forams	Summer	9.83498	12.7198	15.5563	8.88	3.83977
South Atlantic
V22-182	-0.55	-17.27	Coccolithophora	Annual*	21.8679	25.1173	28.4587	25.65	-0.532715
V22-182	-0.55	-17.27	Forams	Annual*	20.3784	22.5408	24.8498	25.65	-3.10919
ODP662	-1.38	-11.74	Alkenones	Annual	24.8965	26.4036	28.0436	25.44	0.963645
GeoB1105	-1.67	-12.43	Alkenones	Annual	25.432	27.143	28.9588	25.28	1.86298
GeoB1105	-1.67	-12.43	Mg/Ca	Annual	23.0748	24.8684	26.7335	25.28	-0.411637
GeoB1105	-1.67	-12.43	Forams	Annual*	18.1303	21.181	23.7927	25.28	-4.09904
RC13-205	-2.28	5.18	Forams	Annual*	21.0242	24.4185	27.0561	25.96	-1.54146
RC13-205	-2.28	5.18	Radiolaria	Annual*	22.2876	25.5723	27.9169	25.96	-0.387671
GeoB1112	-5.77	-10.74	Forams	Annual	21.9453	25.2855	27.9613	25.33	-0.044545
GeoB1112	-5.77	-10.74	Mg/Ca	Annual	23.9997	25.7029	27.5755	25.33	0.372874
V22-38	-9.51	-34.25	Forams	Annual*	24.1344	26.2945	28.4158	26.83	-0.5355
V22-38	-9.51	-34.25	Coccolithophore	Annual*	23.0869	25.144	27.3453	26.83	-1.68601
V22-174	-10.07	-12.82	Forams	Annual*	22.9372	25.0412	27.2162	24.81	0.231185
V22-174	-10.07	-12.82	Coccolithophore	Annual*	20.9727	24.1465	27.4025	24.81	-0.663473
RC13-228	-22.33	11.2	Forams	Annual*	10.4951	13.721	18.5994	18.67	-4.949
RC13-228	-22.33	11.2	Coccolithophore	Annual*	16.4317	19.552	23.2147	18.67	0.881973
RC13-228	-22.33	11.2	Radiolaria	Annual*	18.4763	21.245	24.1244	18.67	2.57503
GeoB1711-4	-23.31	12.38	Alkenones	Annual	19.132	21.3271	22.8204	18.08	3.24713
GeoB1710-3	-23.43	11.7	Alkenones	Annual	19.1082	21.0916	22.4778	18.08	3.01165
RC13-229	-25.5	11.3	Forams	Annual*	15.4553	18.2357	20.5949	18.58	-0.344291
RC13-229	-25.5	11.3	Radiolaria	Annual*	18.5581	20.9948	23.39	18.58	2.41482
RC11-86	-35.78	18.45	Forams	Annual*	14.967	17.0754	19.4052	17.56	-0.484643
RC11-86	-35.78	18.45	Coccolithophore	Annual*	18.0906	21.2342	24.5209	17.56	3.67425
MD96-2080	-36.32	19.47	Mg/Ca	Annual	20.7014	22.2167	24.0137	16.05	6.16669
RC12-294	-37.27	-10.1	Forams	Annual*	13.5217	16.9284	20.3263	15.12	1.80844
RC12-294	-37.27	-10.1	Coccolithophore	Annual*	14.2776	17.7019	21.0524	15.12	2.58187
ODP1089	-40.93	9.9	Radiolaria	Summer	13.698	16.4815	19.2098	11.66	4.82151
ODP1089	-40.93	9.9	Alkenones	Annual	21.5385	23.1622	25.1861	11.66	11.5022
PS2489-2	-42.9	8.97	Forams	Annual	6.97572	10.2278	13.2975	9.2	1.02784
