# Supplementary material for: CMIP6/PMIP4 simulations of the mid-Holocene and Last Interglacial using HadGEM3: comparison to the pre-industrial era, previous model versions and proxy data
Source: Copernicus journal article supplement (doi:10.5194/cp-16-1429-2020), 2020-08-06
Supplement: Supplementary file 2 [file cp-16-1429-2020-supplement.zip]

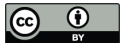

## *Supplement of*

# **CMIP6/PMIP4 simulations of the mid-Holocene and Last Interglacial using HadGEM3: comparison to the pre-industrial era, previous model versions and proxy data**

**Charles J. R. Williams et al.**

*Correspondence to:* Charles J. R. Williams ([c.j.r.williams@bristol.ac.uk](mailto:c.j.r.williams@bristol.ac.uk))

- [cp-16-1429-2020-supplement-title-page.pdf](#)
- [Hoffman\\_etal\\_2017\\_127konly\\_final.xlsx](#)
- [Supplementary material - text and figures.pdf](#)
- [clims\\_hadcm3\\_lig\\_calfix.nc](#)
- [clims\\_hadcm3\\_ligpi.nc](#)
- [clims\\_hadcm3\\_mh\\_calfix.nc](#)
- [clims\\_hadcm3\\_mhpi\\_jja.nc](#)
- [clims\\_hadcm3\\_mhpi\\_yr.nc](#)
- [clims\\_hadgem3\\_lig\\_calfix.nc](#)
- [clims\\_hadgem3\\_mh\\_calfix.nc](#)
- [readme.txt](#)

The copyright of individual parts of the supplement might differ from the CC BY 4.0 License.
