# Supplementary material for: CMIP6/PMIP4 simulations of the mid-Holocene and Last Interglacial using HadGEM3: comparison to the pre-industrial era, previous model versions and proxy data
Source: Copernicus journal article supplement (doi:10.5194/cp-16-1429-2020), 2020-08-06
Supplement: Supplementary file 3 [file cp-16-1429-2020-supplement.zip]

Archive with 11 entries (11 files):
- clims_hadcm3_mh_calfix.nc
- Supplementary material - text and figures.pdf
- readme.txt
- Hoffman_etal_2017_127konly_final.xlsx
- clims_hadcm3_mhpi_jja.nc
- cp-16-1429-2020-supplement-title-page.pdf
- clims_hadcm3_mhpi_yr.nc
- clims_hadgem3_mh_calfix.nc
- clims_hadcm3_ligpi.nc
- clims_hadcm3_lig_calfix.nc
- clims_hadgem3_lig_calfix.nc
