# Supplementary material for: CMIP6/PMIP4 simulations of the mid-Holocene and Last Interglacial using HadGEM3: comparison to the pre-industrial era, previous model versions and proxy data
Source: Copernicus journal article supplement (doi:10.5194/cp-16-1429-2020), 2020-08-06
Supplement: Supplementary file 3 [file cp-16-1429-2020-supplement.zip › readme.txt]

SUPPLEMENTARY MATERIAL - DATA
--------------------------------------------------------------

Hoffman_etal_2017_127konly_final: Excel spreadsheet containing SST proxy data for LIG, based on Hoffman et al. (2017)

clims_hadgem3_*: netcdf files containing climatologies from HadGEM3 warm climate simulations - 1.5m temperature, surface precipitation, u component of wind at 850m, v component of wind at 850m, SST, insolation and AMOC overturning circulation

clims_hadcm3_*: netcdf files containing climatologies from HadGC3 MH, LIG and PI simulations - 1.5m temperature, surface precipitation and SST
